# Supplementary material
Source: PubMed Central journal article supplement (PMC5571341)
Supplement: AAC.00043-17_zac009176473s9.pdf [file AAC.00043-17_zac009176473s9.pdf]

# Supplementary materials – Rapid and consistent evolution of colistin resistance in XDR *Pseudomonas aeruginosa* during morbidostat culture

Bianca Regenbogen<sup>1†\*</sup>, Matthias Willmann<sup>2,5\*</sup>, Matthias Steglich<sup>3</sup>, Boyke Bunk<sup>3,4</sup>, Ulrich Nübel<sup>3,4</sup>, Silke Peter<sup>2,5</sup>, Richard A. Neher<sup>1</sup>

<sup>1</sup>Max Planck Institute for Developmental Biology, 72076 Tübingen.

<sup>†</sup>present address: Institute of Plant Breeding, University of Hohenheim, Stuttgart.

<sup>2</sup>Institute for Medical Microbiology, University Hospital Tübingen.

<sup>3</sup>Leibniz Institute DSMZ, Braunschweig.

<sup>4</sup>German Center for Infection Research (DZIF), Braunschweig

<sup>5</sup>German Center for Infection Research (DZIF), partner site Tübingen, Germany

\*joint first authors.

(Dated: April 20, 2017)

## LIST OF TABLES

|    |                                         |   |
|----|-----------------------------------------|---|
| S1 | ResFinder results for Strain PA77 ..... | 2 |
| S2 | ResFinder results for Strain PA83 ..... | 2 |

## LIST OF FIGURES

|    |                                                                                          |    |
|----|------------------------------------------------------------------------------------------|----|
| S1 | SNP trajectories in cultures of PA77 (tree week experiment) .....                        | 3  |
| S2 | Colistin resistance evolution in PA77 (two week experiment) .....                        | 4  |
| S3 | The dynamics of colistin concentration and mutations in PA77 (two week experiment) ..... | 5  |
| S4 | Mutation trajectories in cultures of PA77 (two week experiment) .....                    | 6  |
| S5 | Colistin resistance evolution in PA83 .....                                              | 7  |
| S6 | The dynamics of mutations in cultures of PA83 .....                                      | 8  |
| S7 | SNP trajectories in cultures of PA83 .....                                               | 9  |
| S8 | SNP trajectories in cultures of PA83 (contd.) .....                                      | 10 |
| S9 | The morbidostat set-up .....                                                             | 11 |

Table S1 ResFinder results for Strain PA77

| Resistance gene             | Identity | Query/HSP | Contig | Position in contig | Phenotype                                     | Accession no.   |
|-----------------------------|----------|-----------|--------|--------------------|-----------------------------------------------|-----------------|
| <i>bla<sub>OXA-50</sub></i> | 100      | 789/789   | c2     | 1012098..1012886   | Beta-lactam resistance                        | AY306132        |
| <i>aph(3')-IIb</i>          | 100      | 807/807   | c2     | 2010995..2011801   | Aminoglycoside resistance                     | X90856          |
| <i>bla<sub>PAO</sub></i>    | 99.25    | 1194/1194 | c2     | 2024047..2025240   | Beta-lactam resistance                        | AY083592        |
| <i>fosA</i>                 | 99.75    | 408/408   | c1     | 2556300..2556707   | Fosfomycin resistance                         | NZ_ACWU01000146 |
| <i>bla<sub>OXA-10</sub></i> | 100      | 801/801   | plsm   | 17857..18657       | Beta-lactam resistance                        | EU886981        |
| <i>aacA4</i>                | 99.82    | 555/555   | plsm   | 18689..19243       | KM278199                                      |                 |
| <i>aac(6')Ib-cr</i>         | 99.42    | 519/519   | plsm   | 18725..19243       | Fluoroquinolone and aminoglycoside resistance | EF636461        |
| <i>bla<sub>IMP-8</sub></i>  | 99.87    | 741/741   | plsm   | 19320..20060       | Beta-lactam resistance                        | EU042136        |
| <i>aacA4</i>                | 99.82    | 555/555   | plsm   | 20670..21224       | KM278199                                      |                 |
| <i>aac(6')Ib-cr</i>         | 99.42    | 519/519   | plsm   | 20706..21224       | Fluoroquinolone and aminoglycoside resistance | EF636461        |
| <i>aph(3')-XV</i>           | 99.87    | 795/795   | plsm   | 21295..22089       | Aminoglycoside resistance                     | Y18050          |
| <i>aadA10</i>               | 99.88    | 834/806   | plsm   | 22206..23011       | Aminoglycoside resistance                     | U37105          |
| <i>bla<sub>OXA-2</sub></i>  | 100      | 828/828   | plsm   | 23041..23868       | Beta-lactam resistance                        | DQ310703        |
| <i>sulI</i>                 | 100      | 927/927   | plsm   | 24258..25184       | Sulphonamide resistance                       | CP002151        |

Table S2 ResFinder results for Strain PA83

| Resistance gene             | Identity | Query/HSP | Contig     | Position in contig | Phenotype                 | Accession no.   |
|-----------------------------|----------|-----------|------------|--------------------|---------------------------|-----------------|
| <i>sulI</i>                 | 100      | 840/840   | chromosome | 2792489..2793328   | Sulphonamide resistance   | AY224185        |
| <i>tet(G)</i>               | 100      | 1176/1176 | chromosome | 2805670..2806845   | Tetracycline resistance   | AF133140        |
| <i>bla<sub>VIM-2</sub></i>  | 100      | 801/801   | chromosome | 3161692..3162492   | Beta-lactam resistance    | AF302086        |
| <i>dfrB5</i>                | 100      | 237/237   | chromosome | 3162641..3162877   | Trimethoprim resistance   | AY943084        |
| <i>aac(3)-Id</i>            | 99.79    | 477/477   | chromosome | 3163003..3163479   | Aminoglycoside resistance | AB114632        |
| <i>aac(3)-Id</i>            | 99.79    | 477/477   | chromosome | 381826..382302     | Aminoglycoside resistance | AB114632        |
| <i>dfrB5</i>                | 100      | 237/237   | chromosome | 382428..382664     | Trimethoprim resistance   | AY943084        |
| <i>fosA</i>                 | 99.26    | 408/408   | chromosome | 4627680..4628087   | Fosfomycin resistance     | NZ_ACWU01000146 |
| <i>catB7</i>                | 98.75    | 639/639   | chromosome | 5178919..5179557   | Phenicol resistance       | AF036933        |
| <i>dfrB5</i>                | 100      | 237/237   | chromosome | 6206269..6206505   | Trimethoprim resistance   | AY943084        |
| <i>aac(3)-Id</i>            | 99.79    | 477/477   | chromosome | 6206631..6207107   | Aminoglycoside resistance | AB114632        |
| <i>bla<sub>OXA-4</sub></i>  | 100      | 831/831   | chromosome | 6218833..6219663   | Beta-lactam resistance    | AY162283        |
| <i>aadA2</i>                | 99.87    | 792/792   | chromosome | 6219776..6220567   | Aminoglycoside resistance | JQ364967        |
| <i>cmlA1</i>                | 99.05    | 1260/1260 | chromosome | 6220829..6222088   | Phenicol resistance       | AB212941        |
| <i>sulI</i>                 | 100      | 927/616   | chromosome | 6222534..6223149   | Sulphonamide resistance   | CP002151        |
| <i>tet(G)</i>               | 100      | 1176/1176 | chromosome | 6225960..6227135   | Tetracycline resistance   | AF133140        |
| <i>sulI</i>                 | 100      | 852/852   | chromosome | 6230553..6231404   | Sulphonamide resistance   | AY963803        |
| <i>bla<sub>OXA-50</sub></i> | 99.62    | 789/789   | chromosome | 6757336..6758124   | Beta-lactam resistance    | AY306135        |
| <i>aph(3')-IIb</i>          | 98.02    | 807/807   | chromosome | 951985..952791     | Aminoglycoside resistance | X90856          |
| <i>bla<sub>PAO</sub></i>    | 99.5     | 1194/1194 | chromosome | 965134..966327     | Beta-lactam resistance    | FJ666065        |

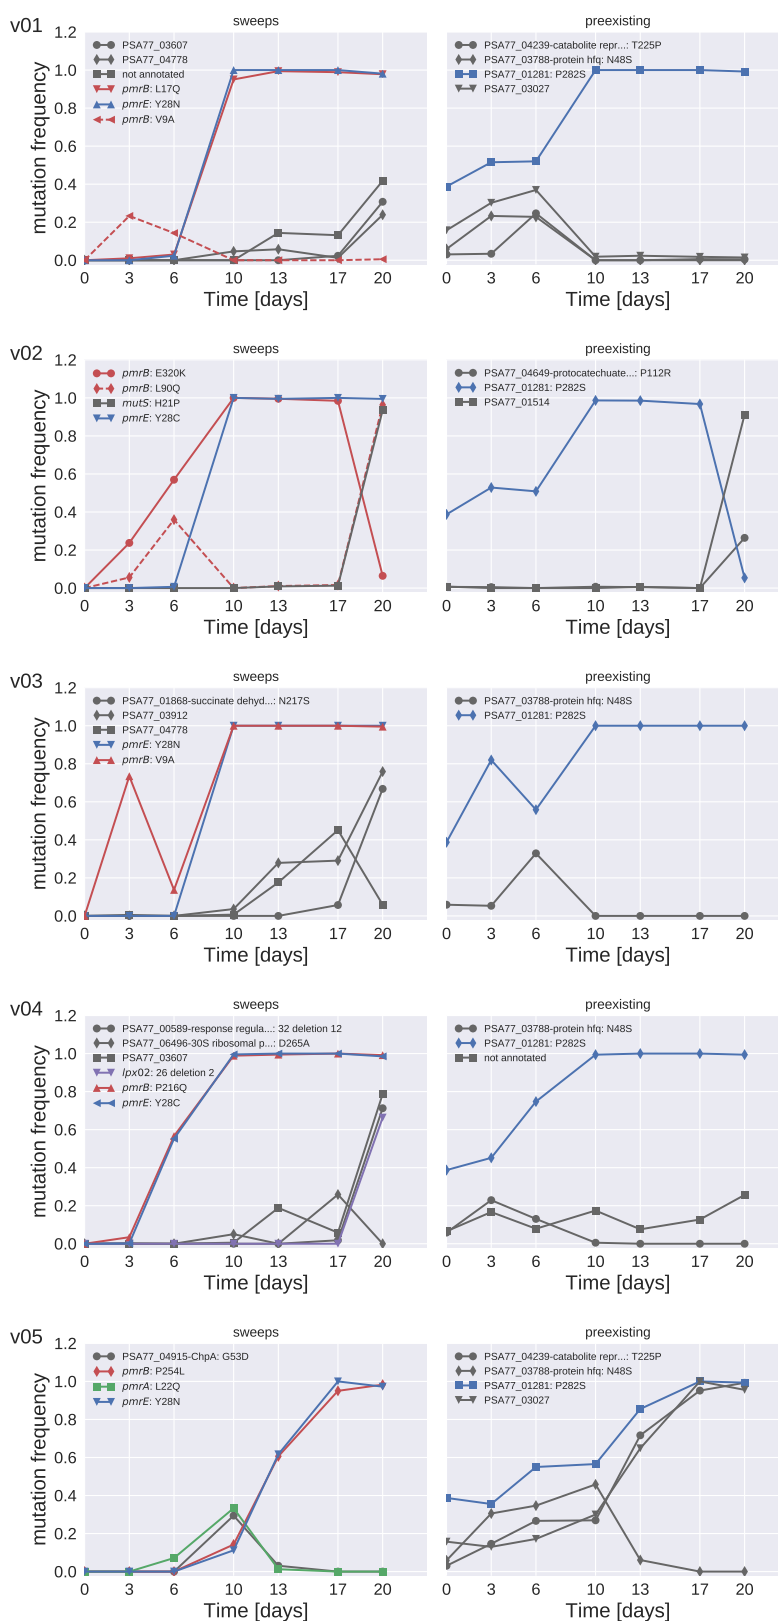

Figure S1 SNP trajectories in cultures of PA77 (three week experiment). The left panels contain trajectories of SNPs not observed in the initial sample (sweeps), the right panels contains those already present in the initial sample (preexisting). Mutations that follow the trajectory of the mutator allele are omitted due to their large number. Trajectories of these mutations can be found in Table S7.

## TWO WEEK EXPERIMENT WITH STRAIN PA77

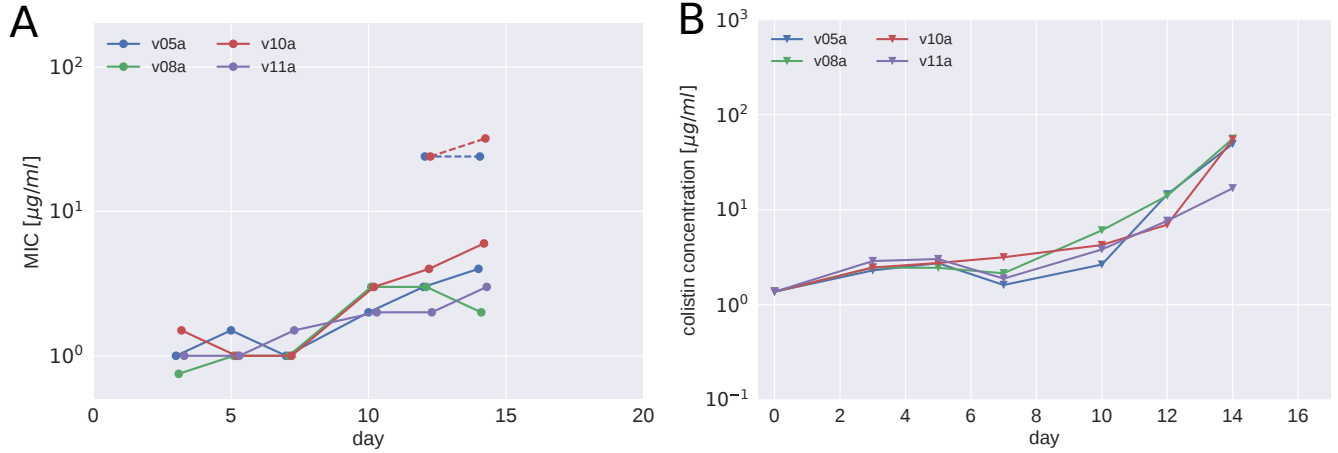

Figure S2 **Colistin resistance evolution in PA77 (two week experiment)**. (A) The time course of MIC in E-tests for each vial in preliminary experiments for strain PA77. Sub-populations showing a higher MIC than the main population were observed after 14 days, respectively. (B) Colistin concentration in each vial in units of the MIC of the initial cultures.

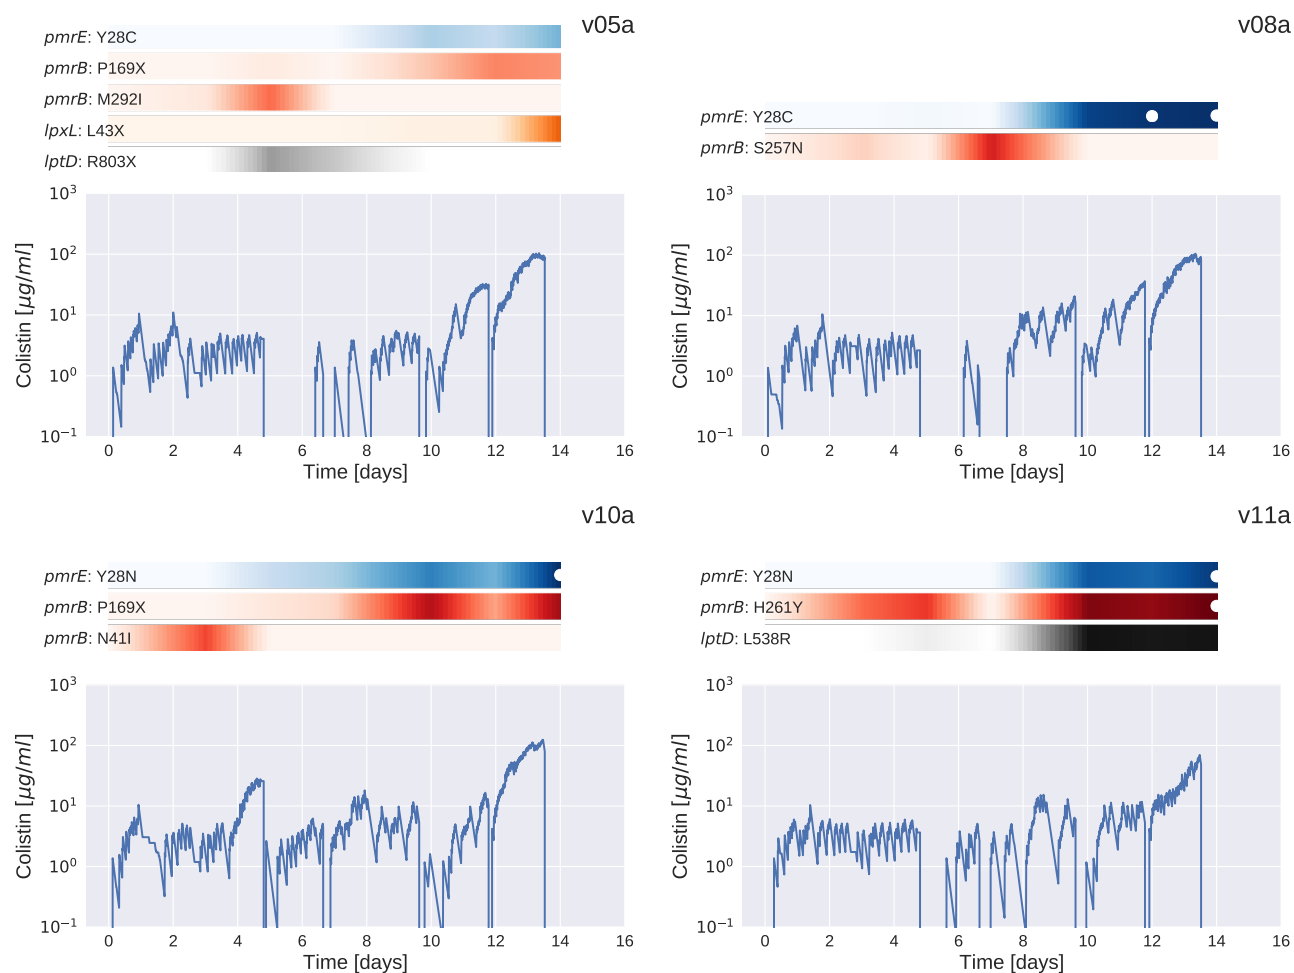

**Figure S3 The dynamics of mutations in PA77 (two week experiment).** For each culture vial, the plot shows the dynamics of colistin concentration in liquid culture. This concentration is inferred from the cycles of colistin addition and waste removal in 10 minute intervals. The shaded bars above the plots show the abundance of different mutations during the experiment. Time points at which a mutation reached a frequency above 95% are highlighted with a white circle. The frequencies of *pmrE* and *pmrB* mutations correlate well with the initial rise in colistin tolerance. The deep dips in colistin concentration every 2-3 days correspond to transfers to fresh culture vials and mark the time points at which samples were taken.

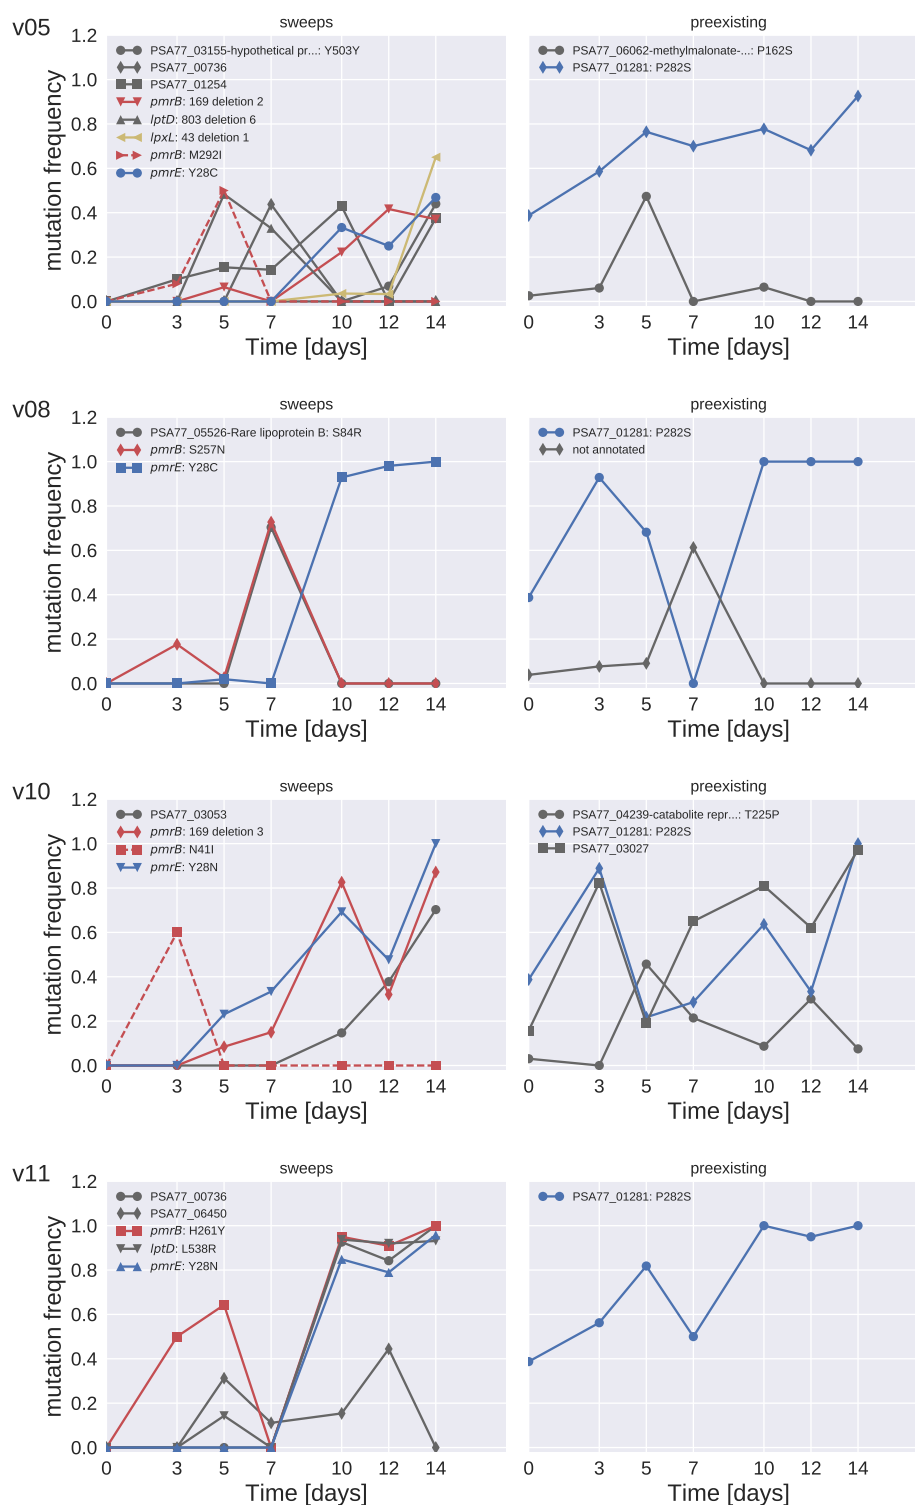

Figure S4 **Mutation trajectories in cultures of PA77 (two week experiment).** The left panels contain trajectories of SNPs not observed in the initial sample (sweeps), the right panels contains those already present in the initial sample (preexisting). This experiment was sequenced at substantially lower coverage than the other two, hence frequency estimates of SNPs are less precise.

## EXPERIMENT WITH STRAIN PA83

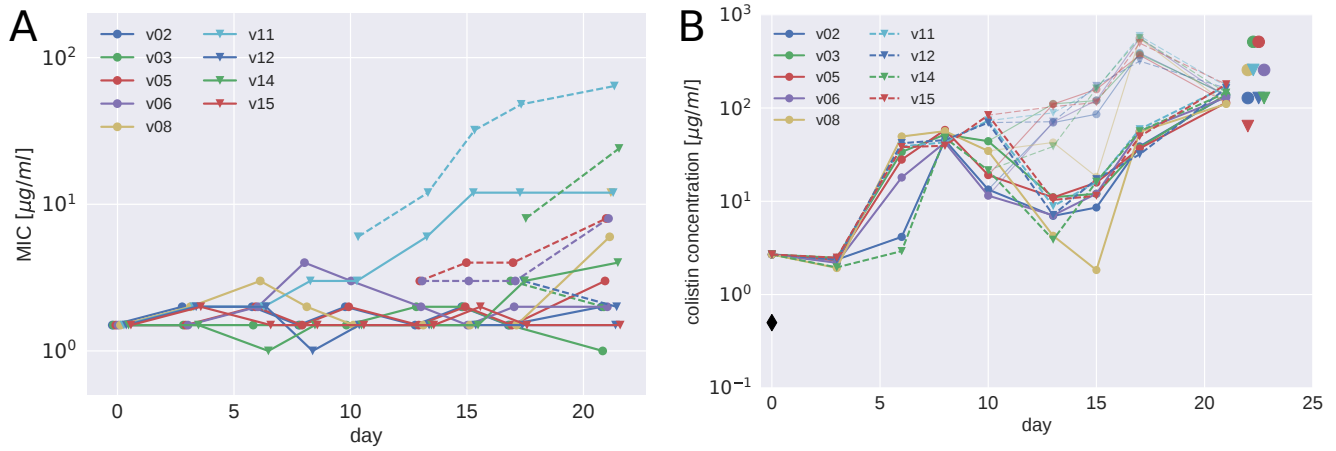

Figure S5 **Colistin resistance evolution in PA83.** (A) The time course of MIC in E-tests for each vial in preliminary experiments for strain PA83. Sub-populations showing a higher MIC than the main population were observed after 9 and 14 days, respectively. (B) Colistin concentration in each vial in units of the MIC of the initial cultures. Concentrations for PA83 have at day 14 and 18 have been corrected for an error during the preparation of the colistin stock solution, which had a 10-fold lower concentration than intended.

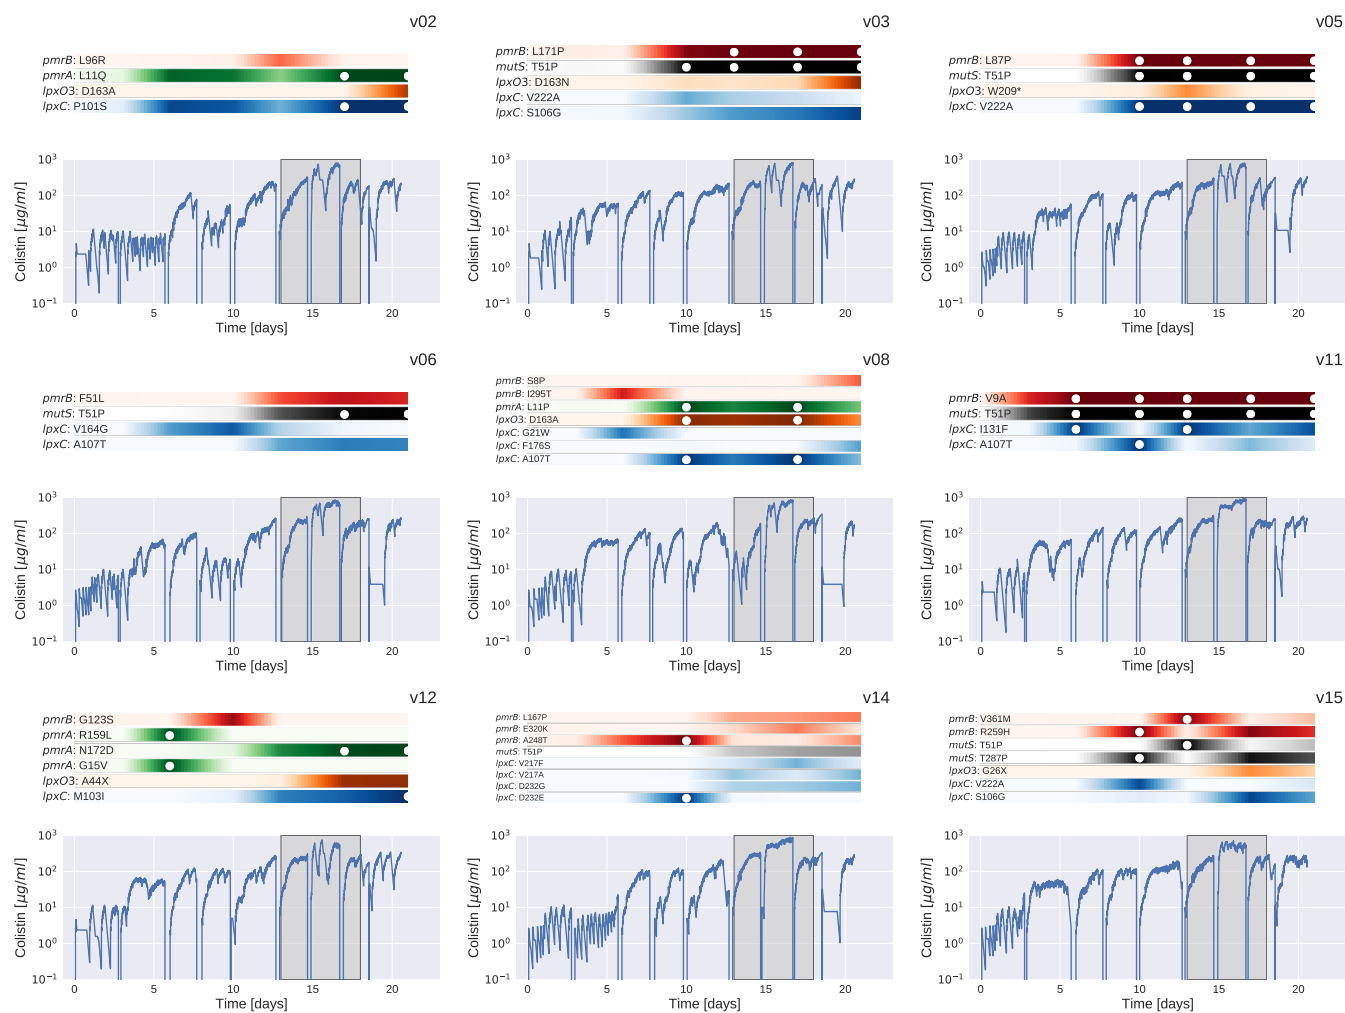

**Figure S6 The dynamics of mutations in cultures of PA83.** For each culture vial, the plot shows the dynamics of colistin concentration in liquid culture. This concentration is inferred from the cycles of colistin addition and waste removal in 10 minute intervals. The shaded bars above the plots show the abundance of different mutations during the experiment. Time points at which a mutation reached a frequency above 95% are highlighted with a white circle. The deep dips in colistin concentration every 2-3 days correspond to transfers to fresh culture vials and mark the time points at which samples were taken. The time interval during which a colistin stock solution with 10-fold lower concentration was used is indicated by a grey box. During these days, the colistin solution in the culture vials was about 10-fold lower than indicated.



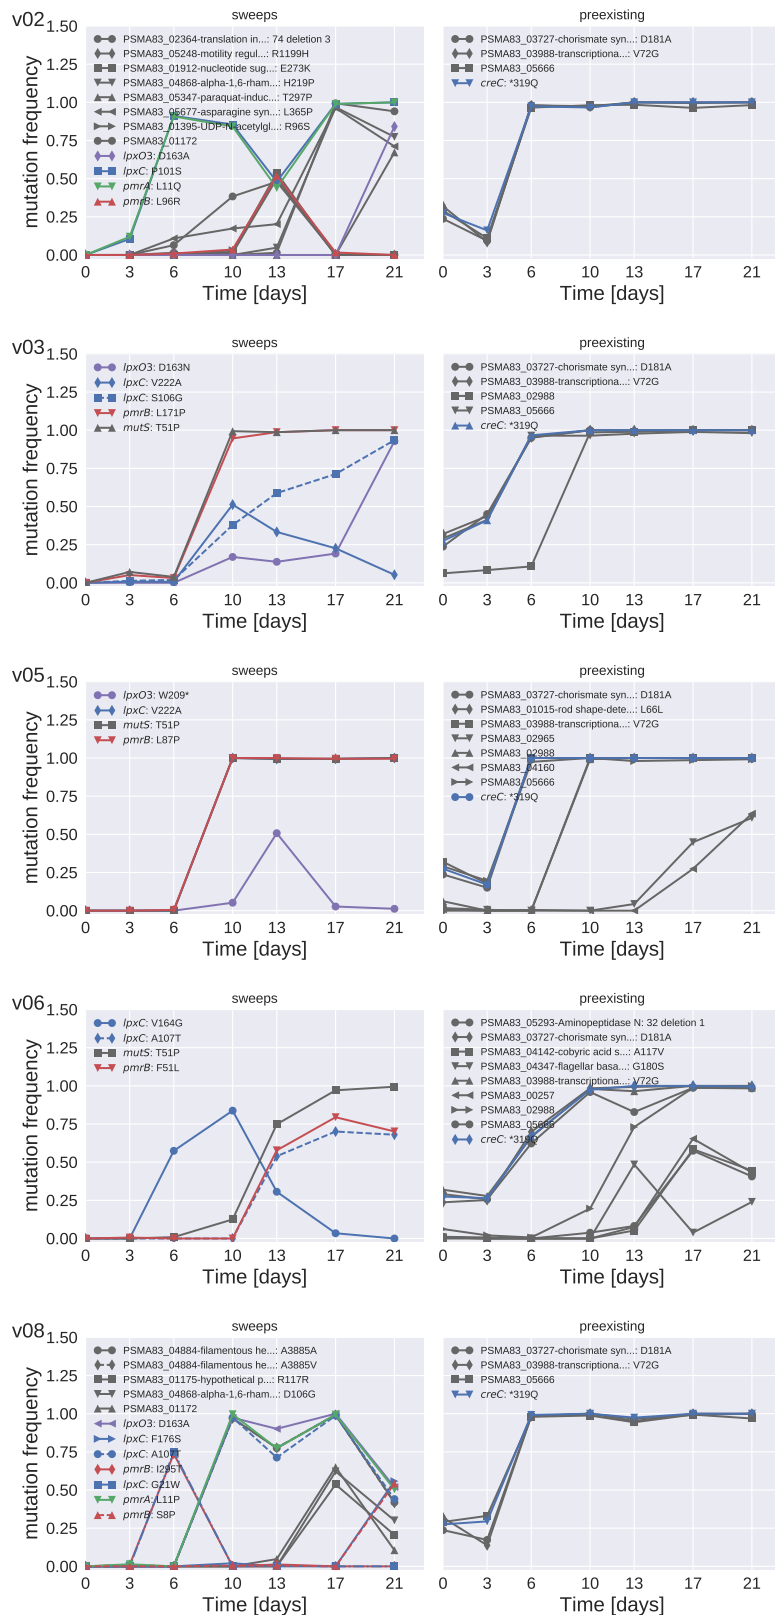

Figure S7 SNP trajectories in cultures of PA83. The left panels contain trajectories of SNPs not observed in the initial sample (sweeps), the right panels contains those already present in the initial sample (preexisting). Mutations that follow the trajectory of the mutator allele are omitted due to their large number. Trajectories of these mutations can be found in Table S7.

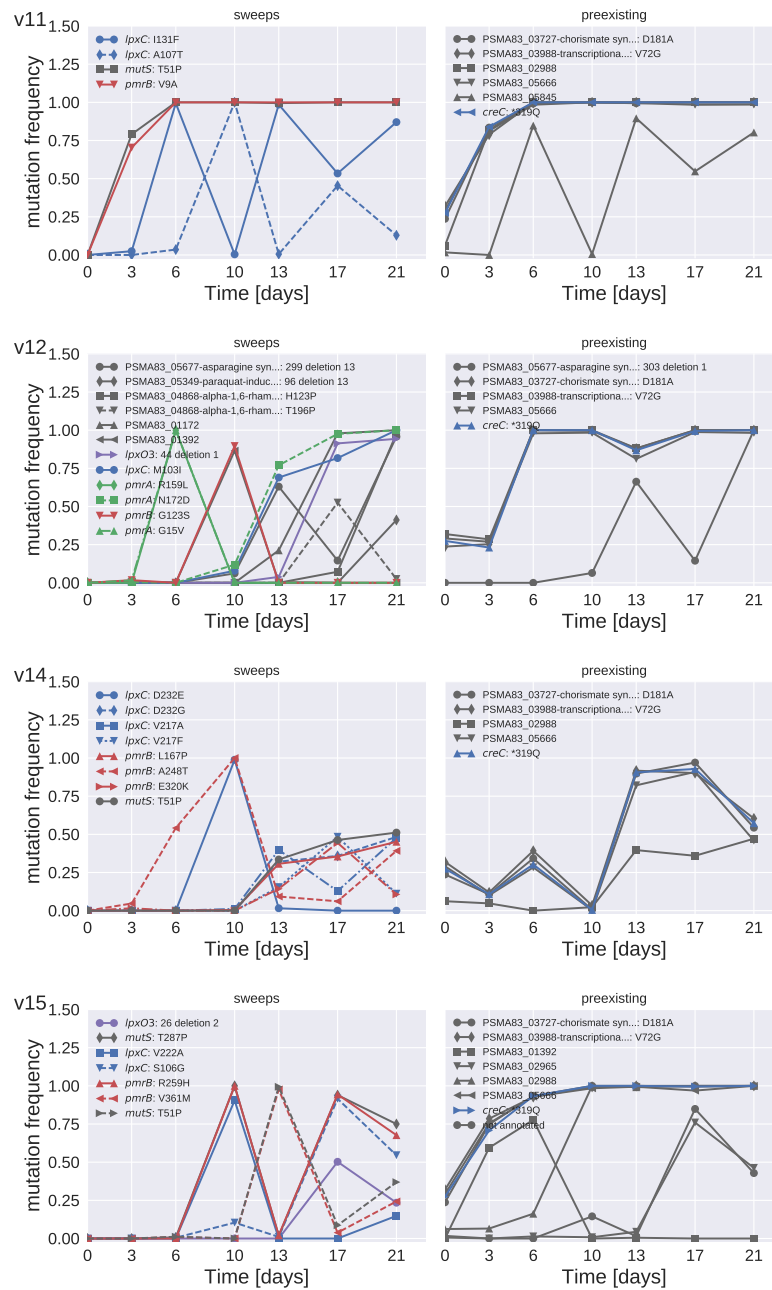

Figure S8 **SNP trajectories in cultures of PA83 (contd.)**. The left panels contain trajectories of SNPs not observed in the initial sample (sweeps), the right panels contains those already present in the initial sample (preexisting). Mutations that follow the trajectory of the mutator allele are omitted due to their large number. Trajectories of these mutations can be found in Table S7.

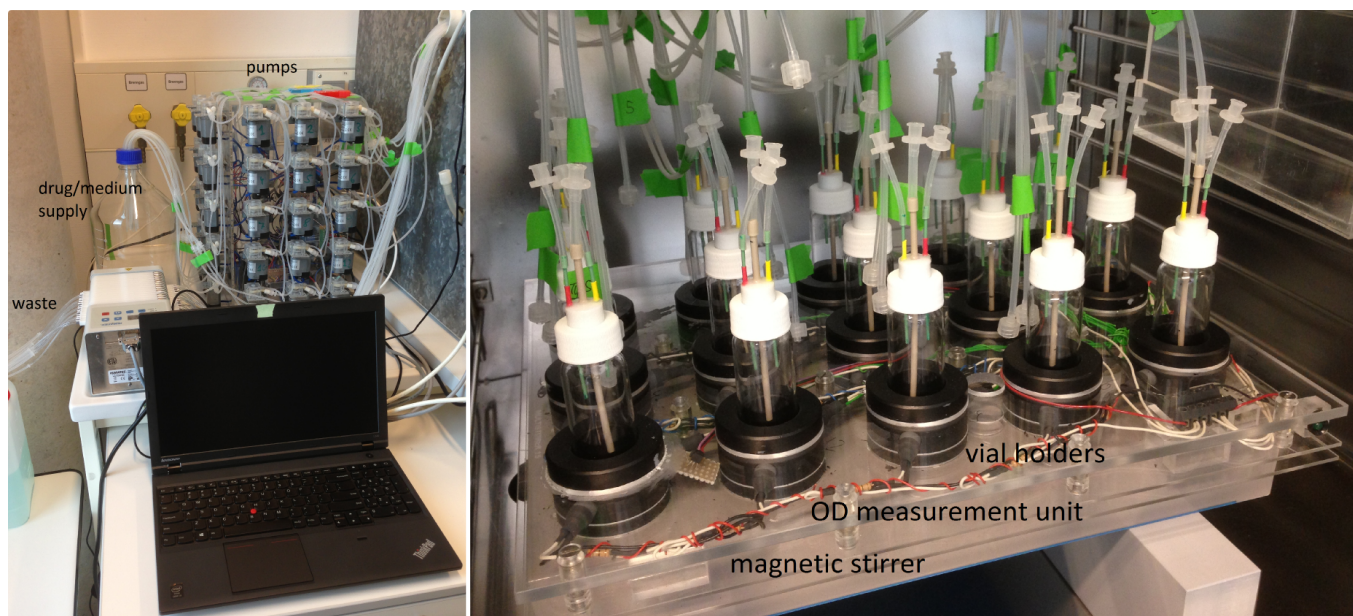

Figure S9 **The morbidostat**. The left picture shows the pump array, the waste pump, and the inlet in the back of the incubator. The right picture shows the sample holder on a magnetic stirrer and the OD measurement electronics.
